# Supplementary material for: Simulating preferential sorption of tartrate on prismatic calcite surfaces
Source: Royal Society of Chemistry journal article supplement (doi:10.1039/c4ce01447b), 2014-11-07
Supplement: c4ce01447b1.pdf [file c4ce01447b1.pdf]

## Supplementary Information for “Simulating preferential sorption of tartrate on prismatic calcite surfaces”

Marko Ukrainczyk <sup>a,b</sup>, Maximilian Greiner <sup>a</sup>, Ekaterina Elts <sup>a</sup>, Heiko Briesen <sup>a\*</sup>

<sup>a</sup> Chair for Process Systems Engineering, Technische Universität München, Gregor-Mendel-Straße 4, D-85354 Freising, Germany

<sup>b</sup> Laboratory for Precipitation Processes, Ruđer Bošković Institute, Bijenička c. 54, HR-10002 Zagreb, Croatia

\* E-mail: heiko.briesen@wzw.tum.de

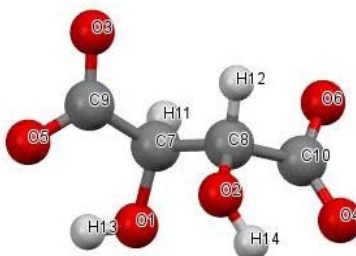

**Fig. S1.** Tartrate molecule structure and atom names.

**Table S1.** Atom names, atom types and RESP charges of tartrate.

| Atom | GAFF atom type | RESP Charge |
|------|----------------|-------------|
| O1   | oh             | -0.7468     |
| O2   | oh             | -0.7804     |
| O3   | o              | -0.8449     |
| O4   | o              | -0.8591     |
| O5   | o              | -0.8202     |
| O6   | o              | -0.8166     |
| C7   | c3             | 0.2351      |
| C8   | c3             | 0.3247      |
| C9   | c              | 0.8092      |
| C10  | c              | 0.8127      |
| H11  | h1             | -0.0468     |
| H12  | h1             | -0.0771     |
| H13  | ho             | 0.3975      |
| H14  | ho             | 0.4125      |
